# Supplementary material for: Physicochemical Property Determinants of Oral Absorption for PROTAC Protein Degraders
Source: PubMed Central journal article supplement — J Med Chem. 2023 Jun 6;66(12):8281–7. doi: 10.1021/acs.jmedchem.3c00740 (PMC10291545; doi:10.1021/acs.jmedchem.3c00740), 2023-06-06

## Supporting Information

### Physicochemical Property Determinants of Oral Absorption for PROTAC Protein Degraders

Authors: Keith R. Hornberger\* and Erika M. V. Araujo

Arvinas Operations, Inc., 5 Science Park, 395 Winchester Avenue, New Haven, CT 06511 USA

\* Corresponding author. email: keith.hornberger@arvinas.com

| Contents of SI                                                                    | Page #     |
|-----------------------------------------------------------------------------------|------------|
| <b>Figure S1.</b> Cl/Qh in rats for the compounds in the dataset.                 | Page S2    |
| <b>Figure S2.</b> Clearance in rats as a function of physicochemical descriptors. | Page S3-S6 |

**Figure S1.**  $Cl/Q_h$  in rats for the compounds in the dataset.

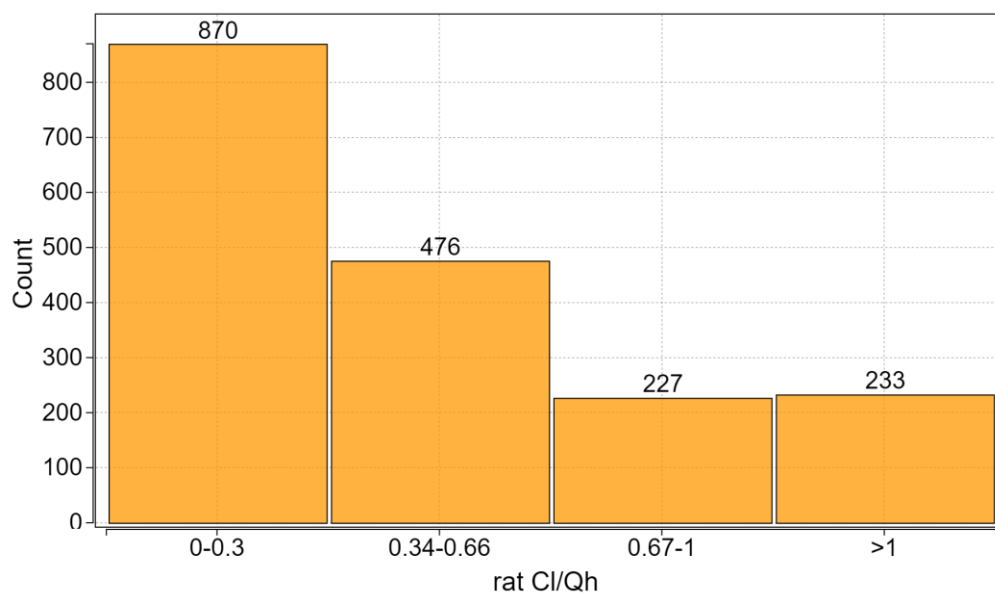

**Figure S2.** Clearance in rats as a function of physicochemical descriptors.

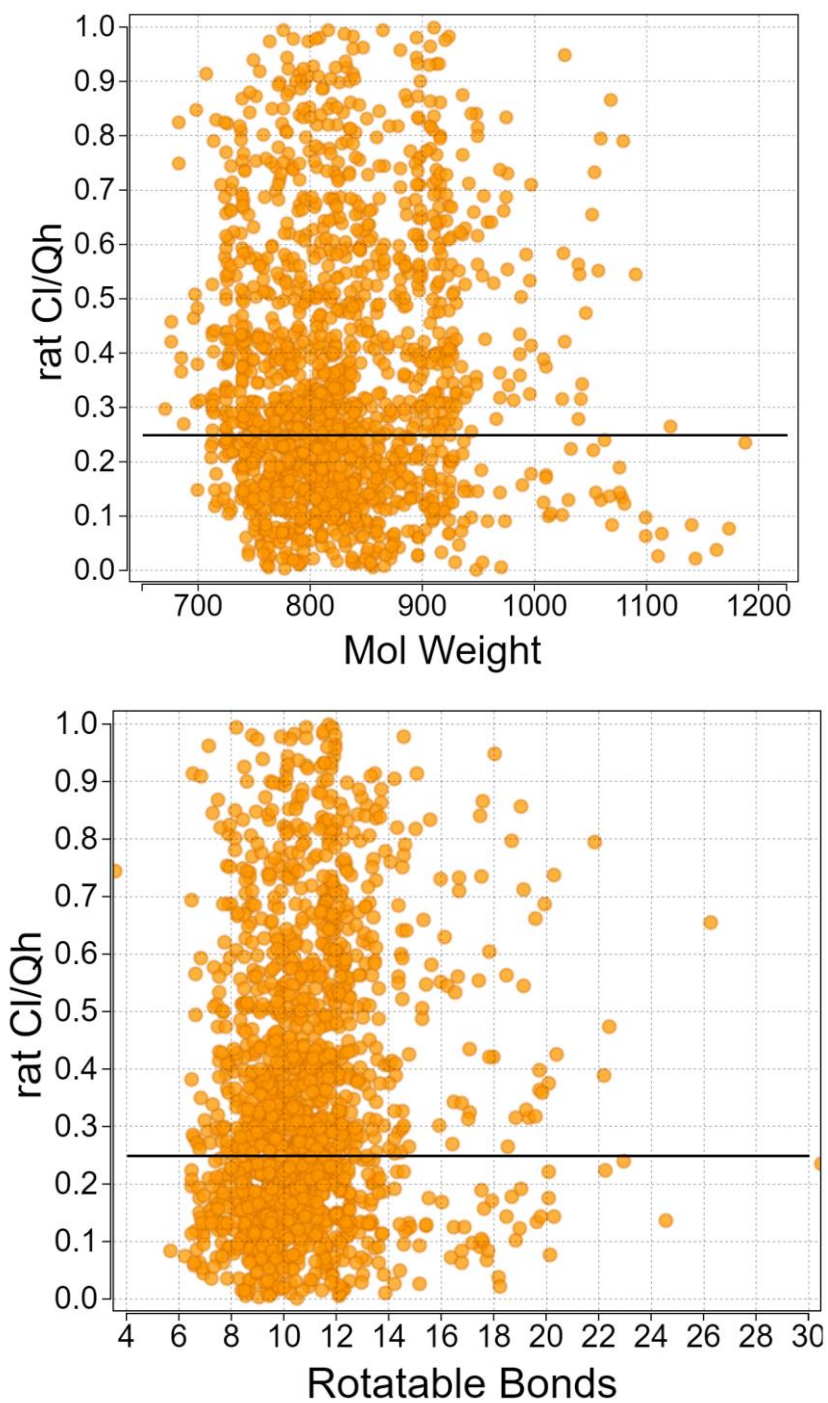

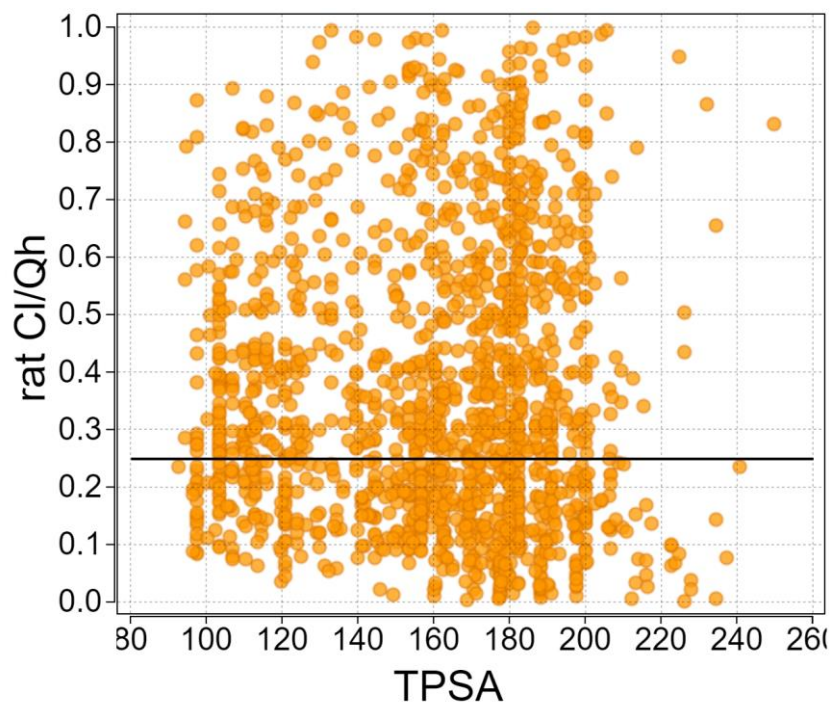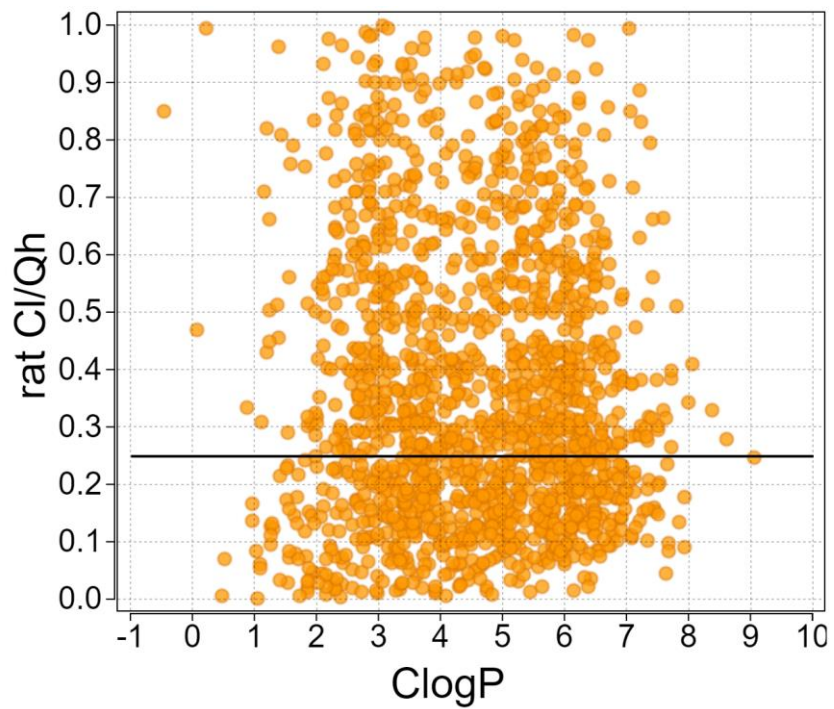

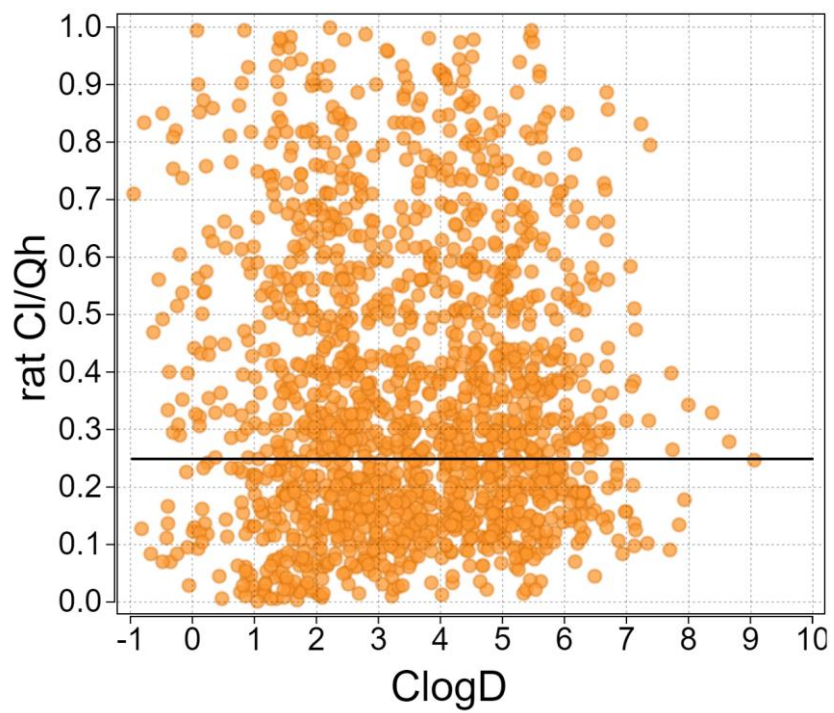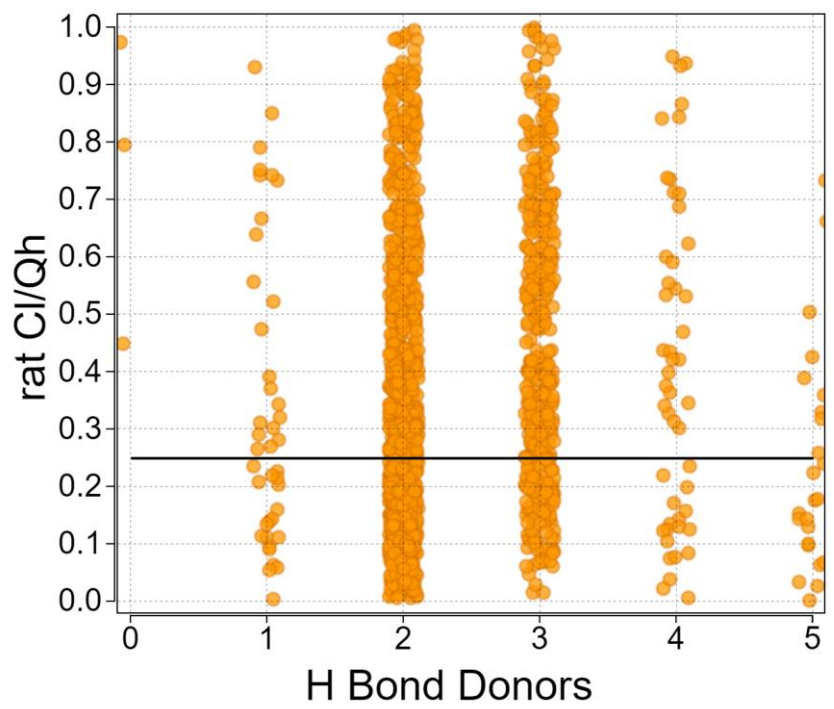



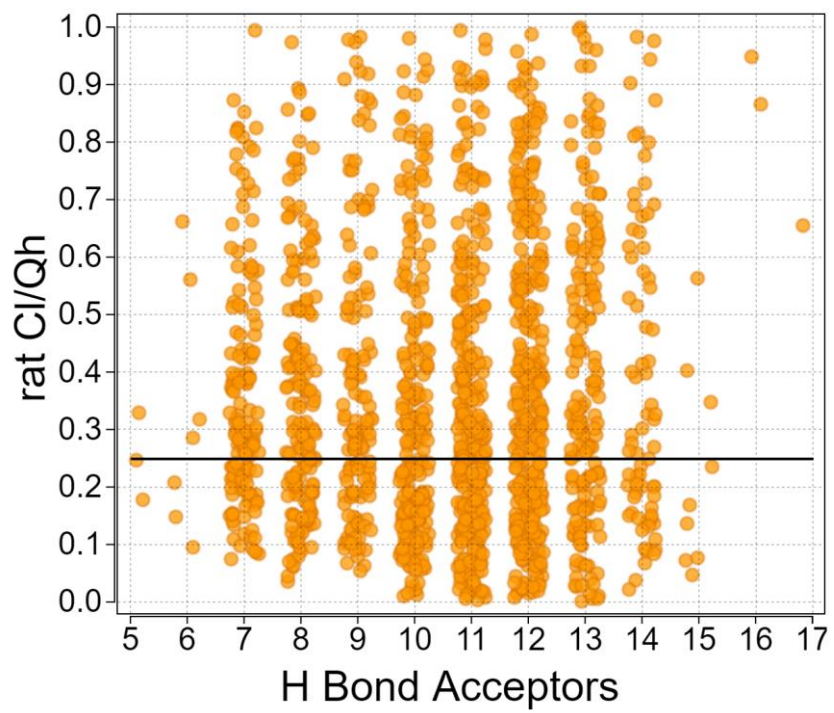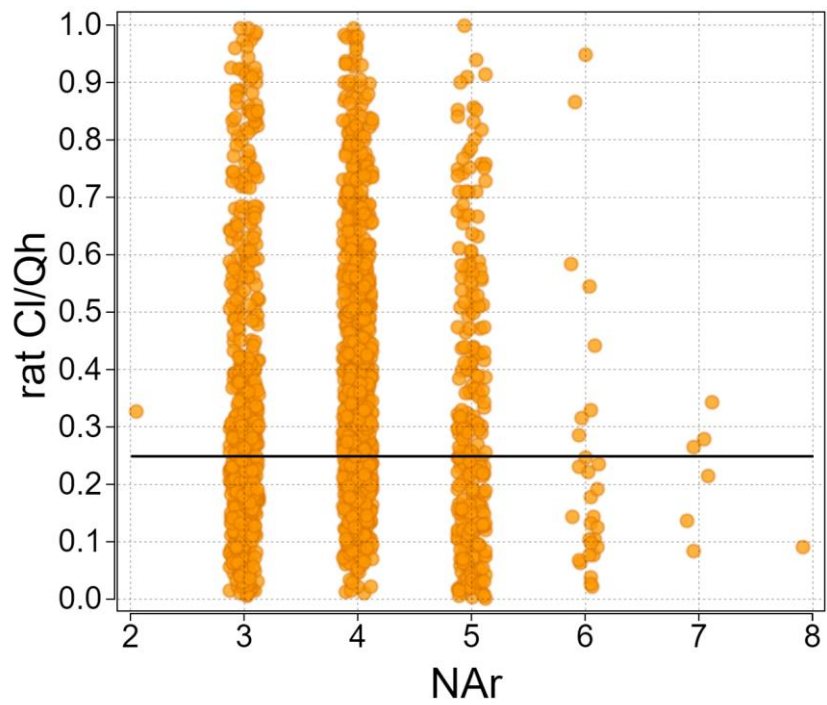

Supplement: jm3c00740_si_002.pdf [file jm3c00740_si_002.pdf]
